# Supplementary material for: Adsorption of potentially toxic metals on negatively charged liposomes: equilibrium isotherms and quantitative modeling
Source: Royal Society of Chemistry journal article supplement (doi:10.1039/c4ra04775c), 2014-01-01
Supplement: c4ra04775c1.pdf [file c4ra04775c1.pdf]

Supporting Information for

**Adsorption of potentially toxic metals on negatively charged liposomes: Equilibrium isotherms and quantitatively modelling**

Y. Yu<sup>a</sup>, X. Liu<sup>b\*</sup>, W. Gong<sup>b</sup>, G. Liu<sup>b</sup>, D. Cheng<sup>b</sup>, H. Bao<sup>a</sup> and D. Gao<sup>b</sup>

<sup>a</sup> College of Chemistry, Beijing Normal University, Beijing, 100875, the People's Republic of China

<sup>b</sup> State Key Laboratory of Water Environment Simulation, School of Environment, Beijing Normal University, Beijing 100875, the People's Republic of China.

\*author for correspondence

## **Content**

**Table S1.** The species distribution of metals by modelling

**Table S1.** The species distribution of metal ions by modelling

| Species name                                  | % of total concentration | Species name                                  | % of total concentration | Species name               | % of total concentration | Species name                     | % of total concentration | Species name                     | % of total concentration |
|-----------------------------------------------|--------------------------|-----------------------------------------------|--------------------------|----------------------------|--------------------------|----------------------------------|--------------------------|----------------------------------|--------------------------|
| <b>Ni</b>                                     |                          | <b>Zn</b>                                     |                          | <b>Co</b>                  |                          | <b>Fe</b>                        |                          | <b>Cr</b>                        |                          |
| Ni <sup>2+</sup>                              | 29.353                   | Zn <sup>2+</sup>                              | 15.374                   | Co <sup>2+</sup>           | 24.91                    | FeHPO <sub>4</sub> <sup>+</sup>  | 1.95                     | Cr(OH) <sub>2</sub> <sup>+</sup> | 7.421                    |
| NiH <sub>2</sub> PO <sub>4</sub> <sup>+</sup> | 0.374                    | ZnHPO <sub>4</sub><br>(aq)                    | 83.99                    | CoHPO <sub>4</sub><br>(aq) | 74.978                   | FeOH <sup>2+</sup>               | 0.024                    | CrOH <sup>2+</sup>               | 0.641                    |
| NiHPO <sub>4</sub><br>(aq)                    | 70.175                   | ZnOH <sup>+</sup>                             | 0.334                    | CoOH <sup>+</sup>          | 0.108                    | Fe(OH) <sup>2+</sup>             | 95.468                   | Cr(OH) <sub>3</sub><br>(aq)      | 91.924                   |
| NiOH <sup>+</sup>                             | 0.08                     | Zn(OH) <sub>2</sub><br>(aq)                   | 0.117                    |                            |                          | Fe(OH) <sub>3</sub><br>(aq)      | 1.488                    | Cr(OH) <sub>4</sub> <sup>-</sup> | 0.011                    |
| NiNO <sub>3</sub> <sup>+</sup>                | 0.015                    | ZnSO <sub>4</sub> (aq)                        | 0.184                    |                            |                          | Fe(OH) <sub>4</sub> <sup>-</sup> | 1.071                    |                                  |                          |
| Ni <sup>2+</sup>                              | 29.353                   | Zn <sup>2+</sup>                              | 15.374                   |                            |                          |                                  |                          |                                  |                          |
| Species name                                  | % of total concentration | Species name                                  | % of total concentration | Species name               | % of total concentration | Species name                     | % of total concentration | Species name                     | % of total concentration |
| <b>Ba</b>                                     |                          | <b>Sr</b>                                     |                          | <b>Cd</b>                  |                          | <b>Ag</b>                        |                          | <b>Hg</b>                        |                          |
| Ba <sup>2+</sup>                              | 69.486                   | Sr <sup>2+</sup>                              | 61.412                   | Cd <sup>2+</sup>           | 6.876                    | Ag <sup>+</sup>                  | 99.992                   | Hg(OH) <sub>2</sub>              | 93.022                   |
| BaHPO <sub>4</sub><br>(aq)                    | 30.484                   | SrHPO <sub>4</sub><br>(aq)                    | 37.929                   | CdHPO <sub>4</sub><br>(aq) | 93.045                   |                                  |                          | HgCl <sub>2</sub> (aq)           | 0.102                    |
| BaNO <sub>3</sub> <sup>+</sup>                | 0.029                    | SrH <sub>2</sub> PO <sub>4</sub> <sup>+</sup> | 0.625                    | CdOH <sup>+</sup>          | 0.012                    |                                  |                          | HgClOH<br>(aq)                   | 6.874                    |
|                                               |                          | SrNO <sub>3</sub> <sup>+</sup>                | 0.033                    | CdCl <sup>+</sup>          | 0.067                    |                                  |                          |                                  |                          |

1. The speciation distribution of metals were calculated by Visual-MINTEQ software, version 3.0
2. The highest concentration of metal ions, the corresponding PBS concentration, pH 7.5 and temperature 25°C were used in speciation calculation.
